# Supplementary material for: Symmetrical and unsymmetrical triphenylamine based diketopyrrolopyrroles and their use as donors for solution processed bulk heterojunction organic solar cells
Source: Royal Society of Chemistry journal article supplement (doi:10.1039/c6ra10442h), 2016-01-01
Supplement: c6ra10442h1.pdf [file c6ra10442h1.pdf]

## SUPPORTING INFORMATION

### Symmetrical and Unsymmetrical Triphenylamine based Diketopyrrolopyrroles and their use as Donor for Solution Processed Bulk Heterojunction Organic Solar Cells

Yuvraj Patil<sup>a</sup>, Rajneesh Misra<sup>\*a</sup>, F. C. Chen<sup>b</sup>, M. L. Keshtov<sup>c</sup>, Ganesh D. Sharma<sup>d\*</sup>

<sup>a</sup>Department of Chemistry

Indian Institute of Technology, Indore (MP) 453552, India

<sup>b</sup>Department of Photonics, National Chiao Tung University, 1001 University Road, Hsinchu 30010, Taiwan

<sup>c</sup>A. N. Nesmeyanov Institute of Organoelement Compounds, Russian Academy of Sciences, Vavilova Str., 28, Moscow 119991, Russia

<sup>d</sup>Department of Physics, The LNM Institute of Information Technology, Jamdoli, Jaipur, 303031, India

|                                                                 |                  |
|-----------------------------------------------------------------|------------------|
| <b>Table of contents</b> .....                                  | <b>Page No.</b>  |
| Experimental part.....                                          | <b>S1–S3</b>     |
| <b>Fig.S1</b> TGA curves of <b>DPP3</b> and <b>DPP4</b> .....   | <b>S4</b>        |
| <b>Fig.S2</b> <sup>1</sup> H NMR spectrum of <b>DPP3</b> .....  | <b>S5</b>        |
| <b>Fig.S3</b> <sup>13</sup> C NMR spectrum of <b>DPP3</b> ..... | <b>S6</b>        |
| <b>Fig.S4</b> HRMS of <b>DPP3</b> .....                         | <b>S7</b>        |
| <b>Fig.S5</b> <sup>1</sup> H NMR spectrum of <b>DPP4</b> .....  | <b>S8</b>        |
| <b>Fig.S6</b> <sup>13</sup> C NMR spectrum of <b>DPP4</b> ..... | <b>S9</b>        |
| <b>Fig.S7</b> HRMS of <b>DPP4</b> .....                         | <b>S10</b>       |
| DFT Calculation data.....                                       | <b>S10 - S14</b> |

### Experimental part

#### General methods

Chemicals were used as received unless otherwise indicated. All oxygen or moisture sensitive reactions were performed under argon atmosphere. <sup>1</sup>H NMR (400 MHz), and <sup>13</sup>C NMR (100MHz) spectra were recorded on the BrukerAvance (III) 400 MHz instrument by using CDCl<sub>3</sub>. <sup>1</sup>H NMR chemical shifts are reported in parts per million (ppm) relative to the solvent

residual peak ( $\text{CDCl}_3$ , 7.26 ppm). Multiplicities are given as: s (singlet), d (doublet), t (triplet), q (quartet), m (multiplet), and the coupling constants,  $J$ , are given in Hz.  $^{13}\text{C}$  NMR chemical shifts are reported relative to the solvent residual peak ( $\text{CDCl}_3$ , 77.02 ppm). Thermogravimetric analysis were performed on the Metler Toledo Thermal Analysis system. UV-visible absorption spectra were recorded on a Carry-100 Bio UV-visible Spectrophotometer. Cyclic voltammograms (CVs) and differential pulse voltammograms (DPVs) were recorded on electrochemical analyzer using glassy carbon as working electrode, Pt wire as the counter electrode, and Saturated  $\text{Ag}/\text{Ag}^+$  as the reference electrode. The scan rate was  $100 \text{ mV s}^{-1}$  for Cyclic voltammetry. A solution of tetrabutylammoniumhexafluorophosphate ( $\text{TBAPF}_6$ ) in dichloromethane (0.1 M) was used as the supporting electrolyte. All of the measurements were done at  $25 \text{ }^\circ\text{C}$ . HRMS were recorded on Bruker-Daltonics, micrOTOF-Q II mass spectrometer.

### Experimental details

The SMOSCs were fabricated with a structure of ITO/PEDOT:PSS/**DPP3** or **DPP4**: $\text{PC}_{71}\text{BM}$ /Al by using conventional solution spin casting technique. The indium tin oxide (ITO) coated glass substrates were cleaned sequentially by ultrasonic treatment in detergent, deionized water, acetone, and isopropyl alcohol for 20 min. A layer of PEDOT:PSS was spin coated (3500 rpm,  $\sim 35 \text{ nm}$  thick) onto ITO glass substrate and baked at  $120^\circ \text{C}$  for 20 min. The active layer was spin coated from the different weight ratios blends of **DPP3** or **DPP4** and  $\text{PC}_{71}\text{BM}$  in chloroform and solvent additive (different concentration of 1,8-diiodooctane (DIO) )/chloroform solution (concentration  $15 \text{ mg/mL}$ ) at 1500 rpm for 25 sec on the top of ITO/PEDOT:PSS substrate. Finally 60 nm Al layer was deposited onto the active layer under high vacuum by a shadow mask to define the active layer  $20 \text{ mm}^2$ . All devices were fabricated and tested in ambient atmosphere without encapsulation. The hole-only and electron-only devices with ITO/ PEDOT:PSS /active layer/ Au and ITO/ Al/active layer : $\text{PC}_{71}\text{BM}$ / Al architectures were also fabricated in an analogous way, in order to measure the hole and electron mobility, respectively. The current-voltage characteristics of the BHJ organic solar cells were measured using a computer controlled Keithley© 238 source meter under simulated AM1.5G,  $100 \text{ mW/cm}^2$ . A xenon light source coupled with optical filter was used to give the stimulated irradiance at the surface of the devices. The incident photon to current efficiency (IPCE) of the devices was measured illuminating the device through the light source and monochromator and the resulting current was measured using a Keithley electrometer under short circuit condition ( $V = 0\text{V}$ ).

## Synthesis of starting precursors DPP1 and DPP2

The starting precursors monobromodiketopyrrolopyrrole **1** and dibromodiketopyrrolopyrrole **2** were synthesized by reported procedures as shown in Scheme S1. Under argon atmosphere reaction of 2-thiophenecarbonitrile with half equivalent of dimethyl succinate in presence of strong base sodium *tert*-butoxide in *tert*-butanol at 120 °C for 12 hours resulted in the formation of diketopyrrolopyrrole (DPP) in 65% yield. After completion of reaction worked up by methanol:hydrochloric acid (300ml methanol:15ml conc.HCl), filtered on Buchner funnel and finally washed with methanol yielded maroon solid. To make soluble, DPP was reacted with excess amount of 1-bromodecane in presence of base  $K_2CO_3$  in *N,N* dimethylformamide (DMF) at 120 °C for 12 hours under argon atmosphere. The solvent was removed under vacuo and crude compound was purified by silica column chromatography (eluted with 50% dichloromethane in hexane) yielded 23% shiny crystalline solid. Then it was brominated with one equivalent and two equivalents of *N*-bromosuccinimide to give monobrominated DPP1 and dibrominated DPP2 respectively. Bromination carried out at room temperature in dry chloroform and compounds were purified by the use of silica-column chromatography, eluted with 30 – 80% of dichloromethane in hexane yielded 90% of pure compounds.

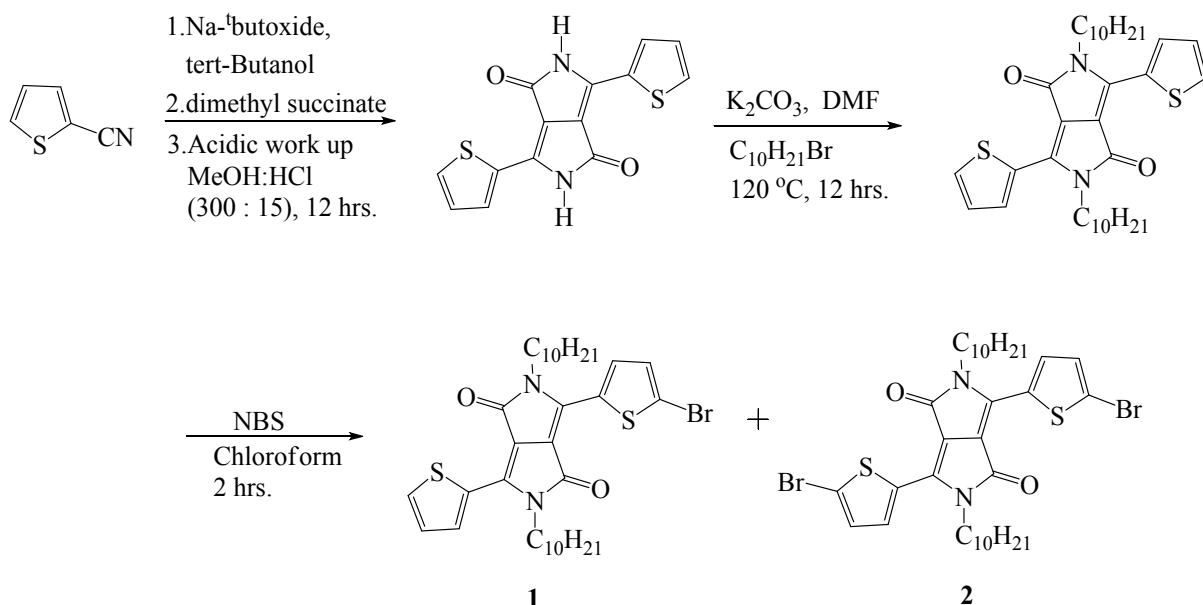

**Scheme S1** Synthesis of alkyl-substituted bromodiketopyrrolopyrroles (DPP1 and DPP2) as precursors.

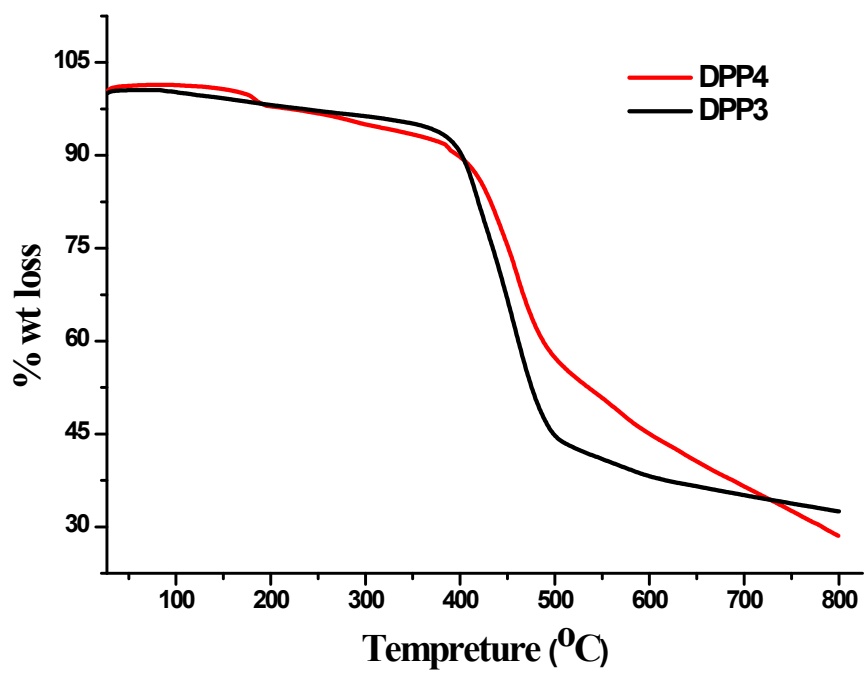

**Fig.S1** TGA Curves of **DPP3** and **DPP4**

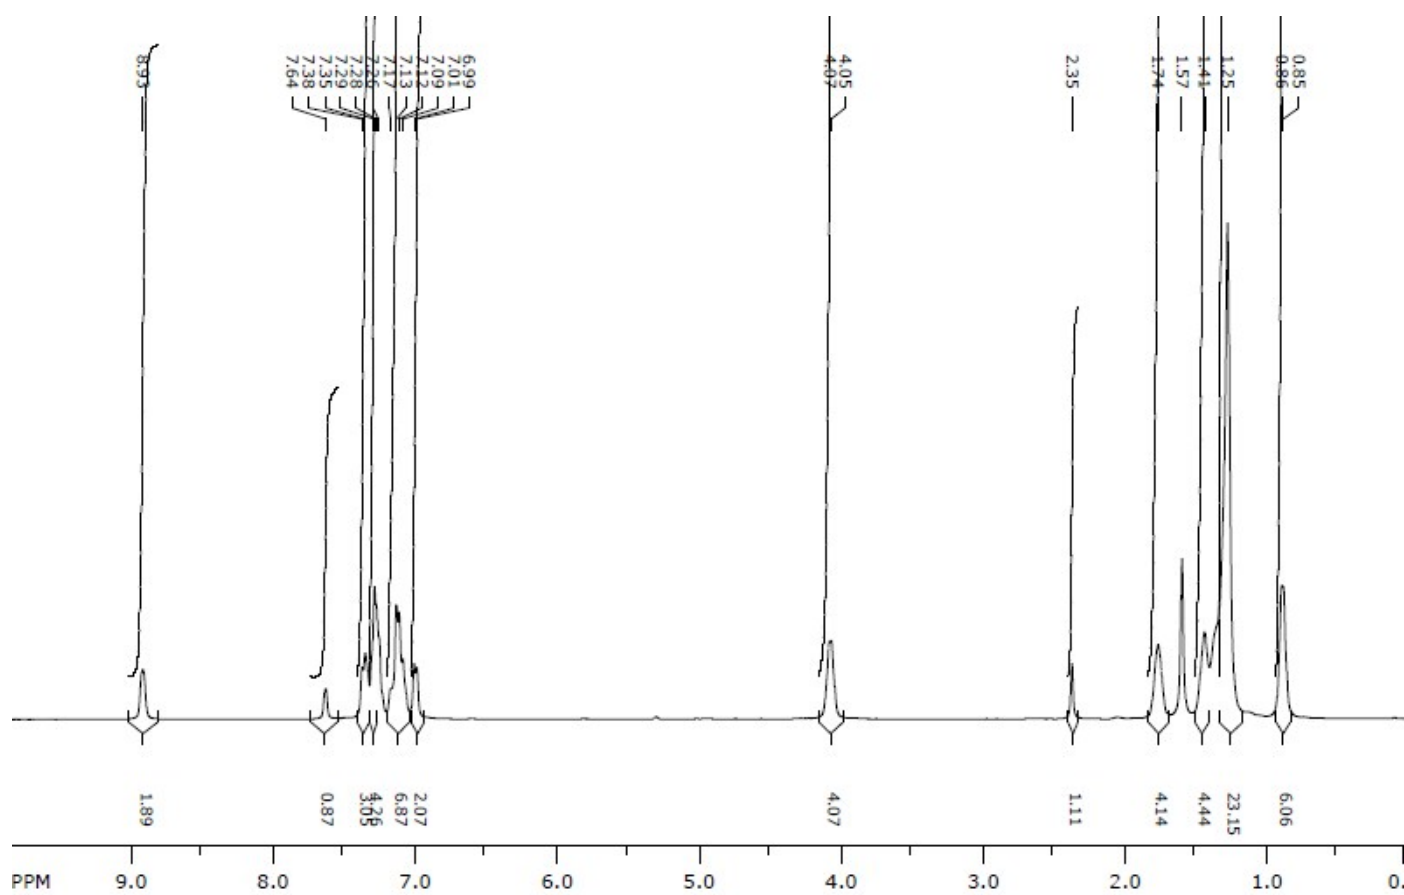

**Fig.S2**<sup>1</sup>H NMR Spectrum of **DPP3**

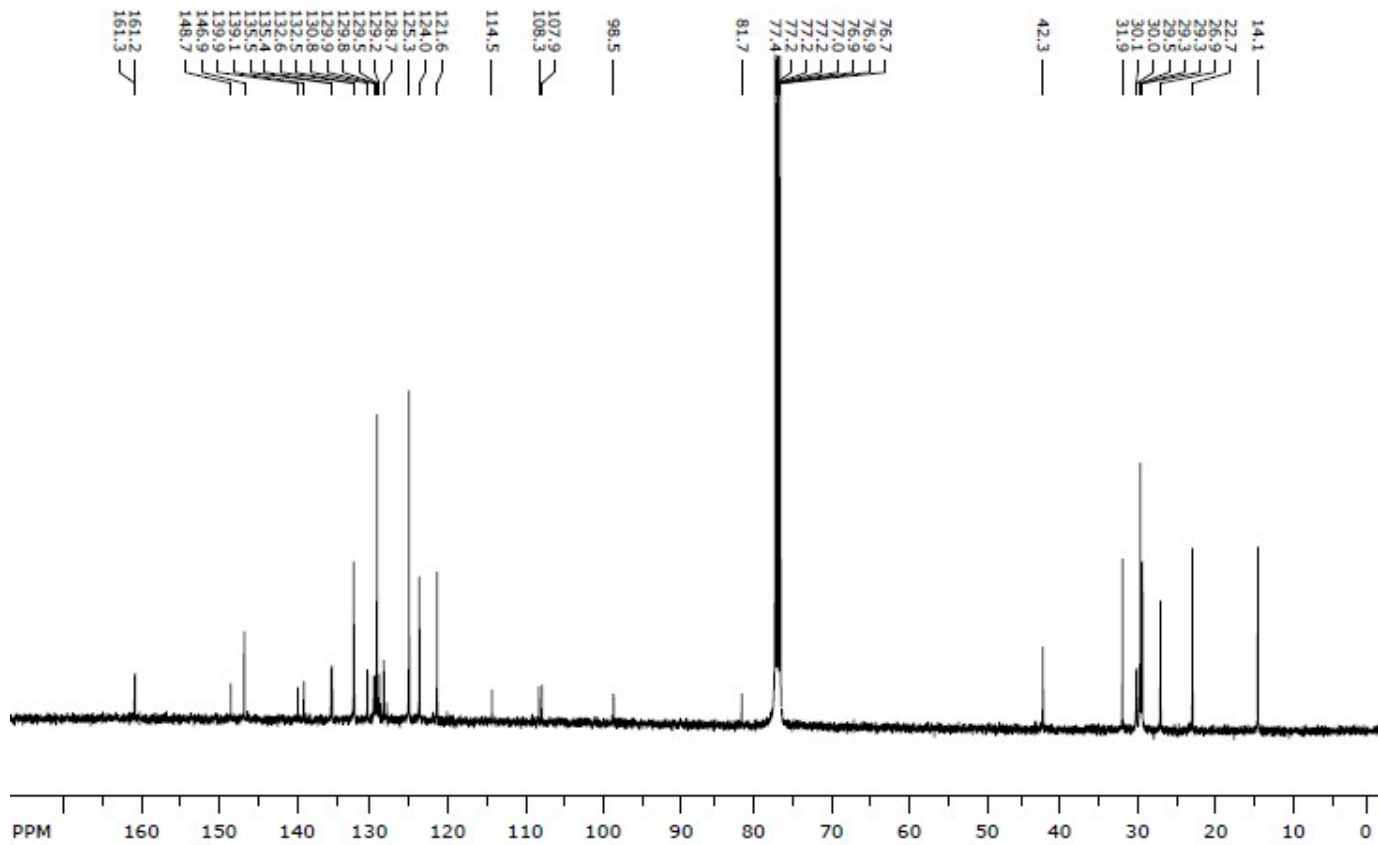

**Fig.S3**  $^{13}\text{C}$  NMR Spectrum of DPP3

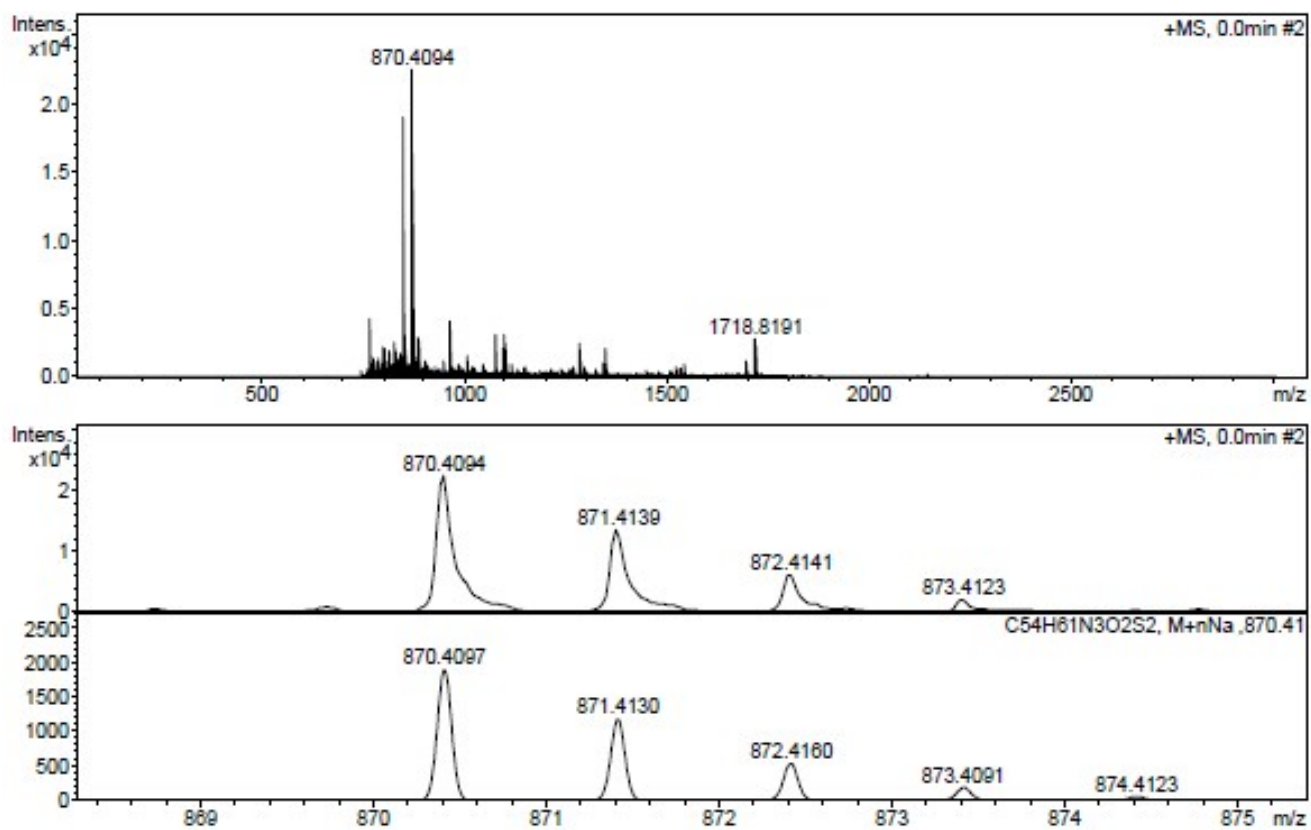

**Fig. S4HRMS of DPP3**

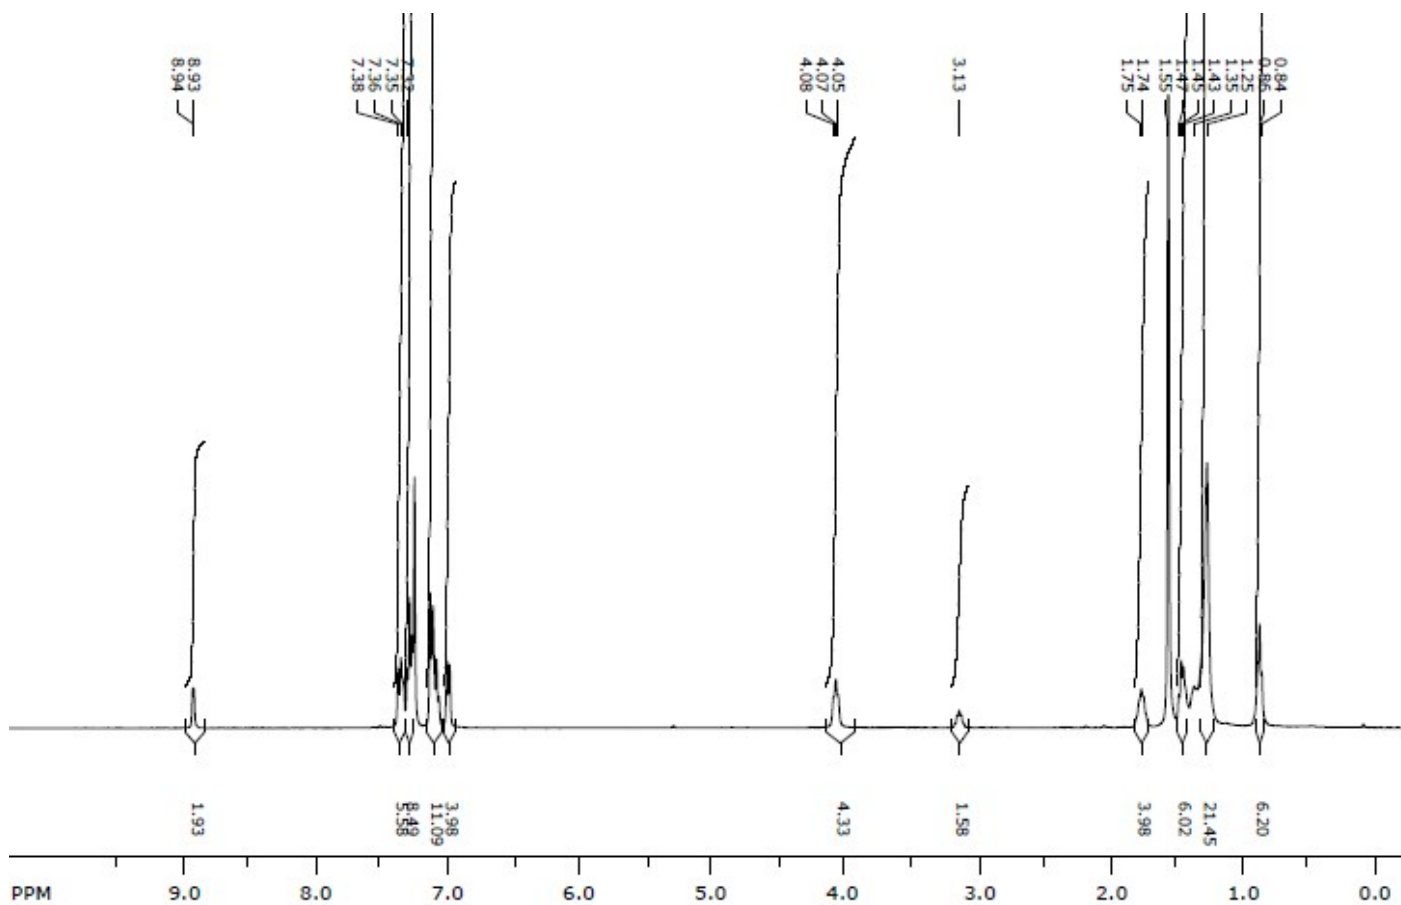

**Fig.S5** <sup>1</sup>H NMR spectrum of DPP4



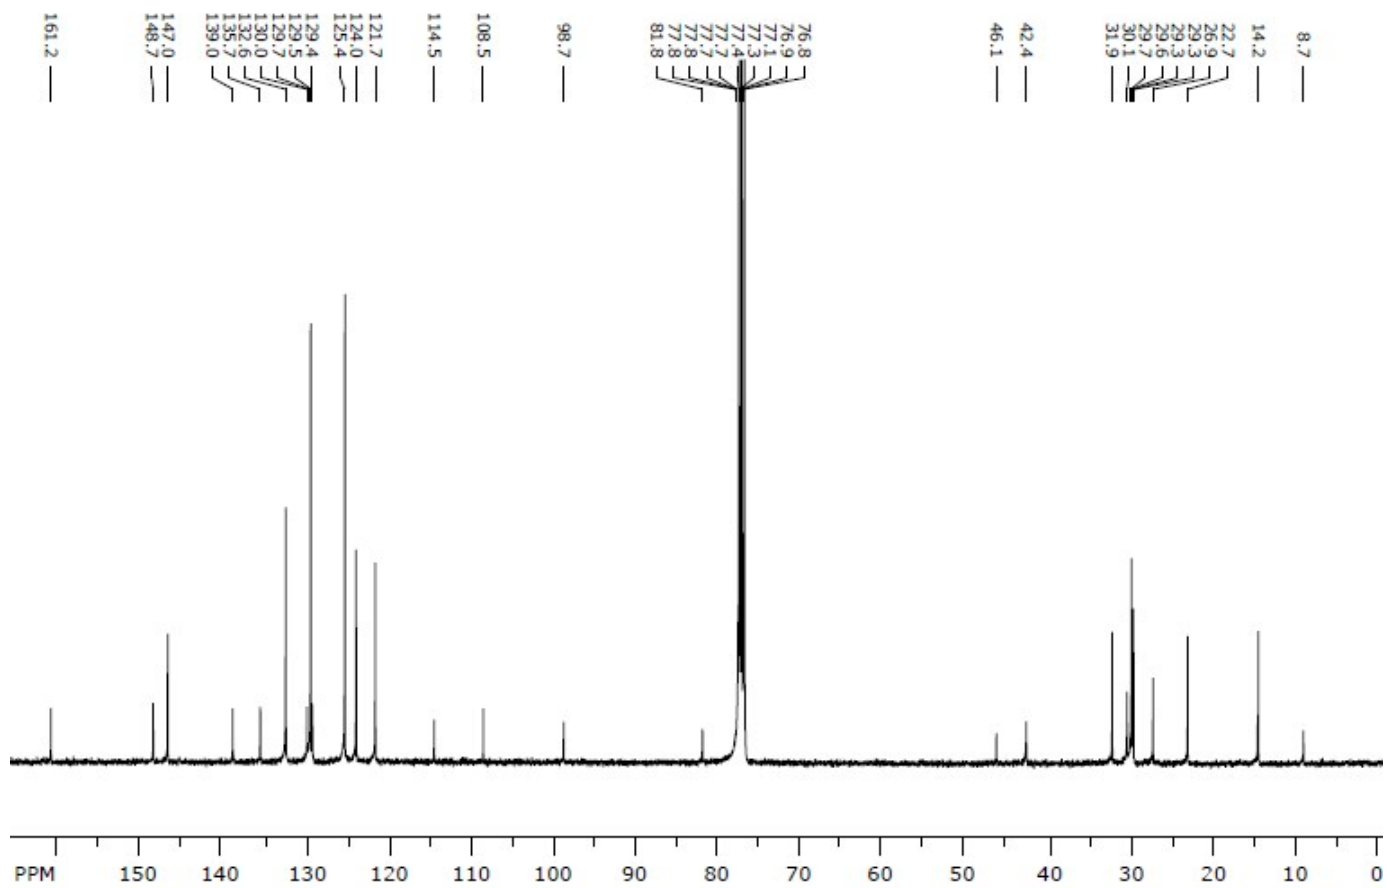

**Fig.S6**  $^{13}\text{C}$  NMR Spectrum of DPP4

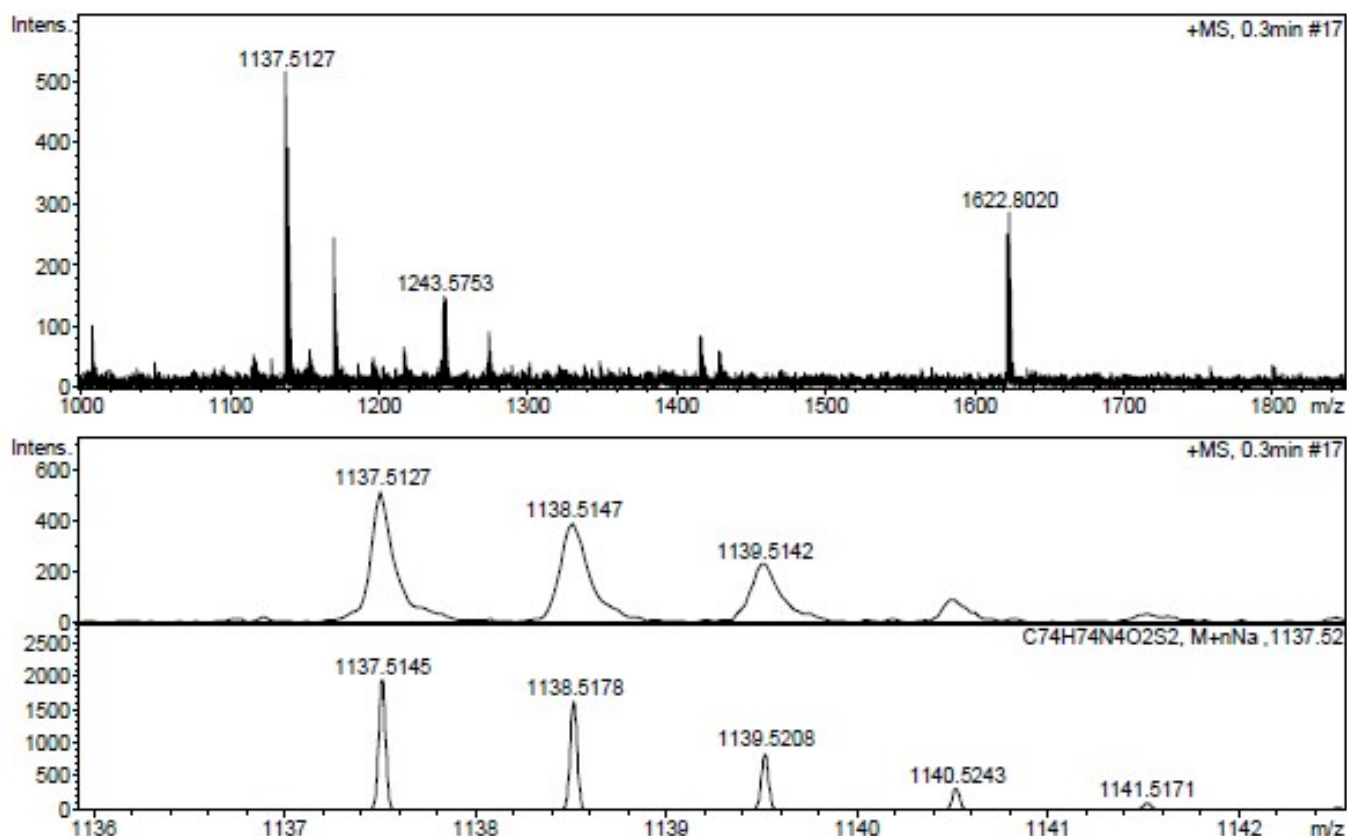

**Fig.S7HRMS of DPP4**

**DFT Calculation data**

Calculation method: B3LYP/6-31+G\*\* for C, H, N, O, S with Gaussian 09.

**DPP3**

Standard orientation:

| Center Number | Atomic Number | Atomic Type | Coordinates (Angstroms) |           |           |
|---------------|---------------|-------------|-------------------------|-----------|-----------|
|               |               |             | X                       | Y         | Z         |
| 1             | 6             | 0           | -6.579787               | -1.515505 | -0.422322 |
| 2             | 6             | 0           | -4.239009               | -1.404181 | -0.346194 |
| 3             | 6             | 0           | -4.748084               | -0.156864 | 0.018996  |
| 4             | 6             | 0           | -6.167708               | -0.188785 | -0.019136 |
| 5             | 6             | 0           | -4.340187               | 1.177926  | 0.400804  |
| 6             | 6             | 0           | -6.674491               | 1.067635  | 0.300396  |
| 7             | 6             | 0           | -8.052162               | 1.498380  | 0.353180  |
| 8             | 6             | 0           | -8.590847               | 2.778327  | 0.337586  |
| 9             | 16            | 0           | -9.348778               | 0.306410  | 0.418131  |
| 10            | 6             | 0           | -10.005470              | 2.801142  | 0.394782  |
| 11            | 1             | 0           | -7.997295               | 3.676493  | 0.251364  |
| 12            | 6             | 0           | -10.548742              | 1.543431  | 0.455349  |

|    |    |   |            |           |           |
|----|----|---|------------|-----------|-----------|
| 13 | 1  | 0 | -10.593163 | 3.711530  | 0.384606  |
| 14 | 1  | 0 | -11.594655 | 1.272130  | 0.502418  |
| 15 | 6  | 0 | -2.860206  | -1.809604 | -0.440602 |
| 16 | 6  | 0 | -2.299090  | -3.056812 | -0.713784 |
| 17 | 16 | 0 | -1.575902  | -0.625403 | -0.176684 |
| 18 | 6  | 0 | -0.895210  | -3.069626 | -0.722808 |
| 19 | 1  | 0 | -2.877554  | -3.950287 | -0.888462 |
| 20 | 6  | 0 | -0.335202  | -1.828120 | -0.453969 |
| 21 | 1  | 0 | -0.297066  | -3.952080 | -0.913624 |
| 22 | 6  | 0 | -5.411127  | -3.614290 | -1.045904 |
| 23 | 1  | 0 | -6.381454  | -3.712500 | -1.538247 |
| 24 | 1  | 0 | -4.642158  | -3.796936 | -1.799818 |
| 25 | 6  | 0 | -5.527619  | 3.257724  | 1.069835  |
| 26 | 1  | 0 | -6.427058  | 3.441238  | 1.660340  |
| 27 | 1  | 0 | -4.669482  | 3.295385  | 1.745996  |
| 28 | 6  | 0 | -5.338154  | 4.303738  | -0.032525 |
| 29 | 1  | 0 | -5.304552  | 5.308062  | 0.402492  |
| 30 | 1  | 0 | -4.394451  | 4.124029  | -0.553067 |
| 31 | 1  | 0 | -6.145854  | 4.274084  | -0.770292 |
| 32 | 6  | 0 | -5.336220  | -4.610053 | 0.115654  |
| 33 | 1  | 0 | -4.407949  | -4.510703 | 0.685281  |
| 34 | 1  | 0 | -6.174368  | -4.446283 | 0.798018  |
| 35 | 1  | 0 | -5.399719  | -5.635636 | -0.262968 |
| 36 | 7  | 0 | -5.344797  | -2.219323 | -0.621564 |
| 37 | 7  | 0 | -5.575035  | 1.888841  | 0.562151  |
| 38 | 8  | 0 | -7.675299  | -2.043555 | -0.579653 |
| 39 | 8  | 0 | -3.248633  | 1.706832  | 0.588545  |
| 40 | 6  | 0 | 1.021938   | -1.486554 | -0.380795 |
| 41 | 6  | 0 | 2.196798   | -1.165919 | -0.310237 |
| 42 | 6  | 0 | 3.562692   | -0.795509 | -0.225057 |
| 43 | 6  | 0 | 3.935312   | 0.529545  | 0.086248  |
| 44 | 6  | 0 | 4.589986   | -1.737163 | -0.446064 |
| 45 | 6  | 0 | 5.269593   | 0.893673  | 0.179594  |
| 46 | 1  | 0 | 3.161201   | 1.267303  | 0.270048  |
| 47 | 6  | 0 | 5.924790   | -1.371321 | -0.364782 |
| 48 | 1  | 0 | 4.326303   | -2.759169 | -0.697964 |
| 49 | 6  | 0 | 6.291118   | -0.049288 | -0.046053 |
| 50 | 1  | 0 | 5.531912   | 1.914334  | 0.434132  |
| 51 | 1  | 0 | 6.697242   | -2.108493 | -0.552360 |
| 52 | 7  | 0 | 7.649311   | 0.323555  | 0.043529  |
| 53 | 6  | 0 | 8.067596   | 1.623942  | -0.364764 |
| 54 | 6  | 0 | 8.946238   | 2.368349  | 0.436545  |
| 55 | 6  | 0 | 7.616152   | 2.169696  | -1.576216 |
| 56 | 6  | 0 | 9.367892   | 3.631881  | 0.027080  |
| 57 | 1  | 0 | 9.293936   | 1.950464  | 1.375420  |
| 58 | 6  | 0 | 8.029318   | 3.441269  | -1.968727 |
| 59 | 1  | 0 | 6.943960   | 1.593457  | -2.203246 |
| 60 | 6  | 0 | 8.909474   | 4.177798  | -1.173408 |
| 61 | 1  | 0 | 10.048143  | 4.196765  | 0.657849  |
| 62 | 1  | 0 | 7.671700   | 3.850915  | -2.908938 |
| 63 | 1  | 0 | 9.234590   | 5.165286  | -1.485853 |
| 64 | 6  | 0 | 8.621899   | -0.594057 | 0.535794  |
| 65 | 6  | 0 | 8.364050   | -1.360657 | 1.683003  |
| 66 | 6  | 0 | 9.856458   | -0.733353 | -0.116472 |
| 67 | 6  | 0 | 9.320212   | -2.256866 | 2.156410  |
| 68 | 1  | 0 | 7.415440   | -1.249292 | 2.197545  |
| 69 | 6  | 0 | 10.813379  | -1.618825 | 0.375416  |
| 70 | 1  | 0 | 10.058150  | -0.144846 | -1.005146 |

|    |   |   |           |           |           |
|----|---|---|-----------|-----------|-----------|
| 71 | 6 | 0 | 10.550738 | -2.389035 | 1.509883  |
| 72 | 1 | 0 | 9.105956  | -2.843248 | 3.045235  |
| 73 | 1 | 0 | 11.764275 | -1.715479 | -0.140544 |
| 74 | 1 | 0 | 11.296047 | -3.082780 | 1.886267  |

-----  
Total Energy (HF) = -2576.5843083Hartree

## DPP4

Standard orientation:

| Center<br>Number | Atomic<br>Number | Atomic<br>Type | Coordinates (Angstroms) |           |           |
|------------------|------------------|----------------|-------------------------|-----------|-----------|
|                  |                  |                | X                       | Y         | Z         |
| 1                | 6                | 0              | 1.114209                | -1.377461 | 0.312294  |
| 2                | 6                | 0              | -1.218083               | -1.274107 | 0.129407  |
| 3                | 6                | 0              | -0.709359               | 0.011532  | -0.054741 |
| 4                | 6                | 0              | 0.706381                | -0.015451 | 0.041785  |
| 5                | 6                | 0              | -1.117175               | 1.373754  | -0.324468 |
| 6                | 6                | 0              | 1.214987                | 1.270429  | -0.141175 |
| 7                | 6                | 0              | 2.586312                | 1.705812  | -0.096505 |
| 8                | 6                | 0              | 3.116483                | 2.991906  | -0.008012 |
| 9                | 16               | 0              | 3.892022                | 0.520583  | -0.118847 |
| 10               | 6                | 0              | 4.519898                | 3.034777  | 0.022246  |
| 11               | 1                | 0              | 2.512299                | 3.883382  | 0.066752  |
| 12               | 1                | 0              | 5.099122                | 3.946895  | 0.095984  |
| 13               | 6                | 0              | -2.589698               | -1.709041 | 0.086444  |
| 14               | 6                | 0              | -3.120670               | -2.995129 | 0.002813  |
| 15               | 16               | 0              | -3.894749               | -0.522999 | 0.105679  |
| 16               | 6                | 0              | -4.524156               | -3.037314 | -0.026213 |
| 17               | 1                | 0              | -2.517145               | -3.887250 | -0.069171 |
| 18               | 6                | 0              | -5.110995               | -1.780471 | 0.035146  |
| 19               | 1                | 0              | -5.103927               | -3.949381 | -0.096239 |
| 20               | 6                | 0              | -0.069608               | -3.520405 | 0.729832  |
| 21               | 1                | 0              | 0.791637                | -3.620206 | 1.395475  |
| 22               | 1                | 0              | -0.964408               | -3.762525 | 1.306492  |
| 23               | 6                | 0              | 0.066819                | 3.516637  | -0.742014 |
| 24               | 1                | 0              | 0.963248                | 3.758827  | -1.316085 |
| 25               | 1                | 0              | -0.792509               | 3.615942  | -1.410230 |
| 26               | 6                | 0              | -0.125702               | 4.452586  | 0.454650  |
| 27               | 1                | 0              | -0.163509               | 5.493429  | 0.116391  |
| 28               | 1                | 0              | -1.069144               | 4.221458  | 0.955322  |
| 29               | 1                | 0              | 0.681290                | 4.357893  | 1.187628  |
| 30               | 6                | 0              | 0.119091                | -4.455999 | -0.467726 |
| 31               | 1                | 0              | -0.689794               | -4.360518 | -1.198502 |
| 32               | 1                | 0              | 1.061330                | -4.225309 | -0.970873 |
| 33               | 1                | 0              | 0.157153                | -5.497008 | -0.129993 |
| 34               | 7                | 0              | -0.118134               | -2.108206 | 0.360787  |
| 35               | 7                | 0              | 0.115042                | 2.104595  | -0.372202 |
| 36               | 8                | 0              | 2.205196                | -1.913394 | 0.479356  |
| 37               | 8                | 0              | -2.208160               | 1.909682  | -0.491600 |
| 38               | 6                | 0              | -6.475706               | -1.461802 | 0.028705  |
| 39               | 6                | 0              | -7.659256               | -1.166592 | 0.026088  |
| 40               | 6                | 0              | -9.037059               | -0.831640 | 0.021313  |
| 41               | 6                | 0              | -9.457578               | 0.512118  | 0.114539  |
| 42               | 6                | 0              | -10.028855              | -1.830449 | -0.077355 |
| 43               | 6                | 0              | -10.804289              | 0.841542  | 0.103491  |
| 44               | 1                | 0              | -8.711159               | 1.296874  | 0.180066  |
| 45               | 6                | 0              | -11.376014              | -1.502894 | -0.076912 |

|     |   |   |            |           |           |
|-----|---|---|------------|-----------|-----------|
| 46  | 1 | 0 | -9.727588  | -2.871044 | -0.139695 |
| 47  | 6 | 0 | -11.789933 | -0.159803 | 0.010664  |
| 48  | 1 | 0 | -11.104686 | 1.881618  | 0.162424  |
| 49  | 1 | 0 | -12.121195 | -2.287919 | -0.139882 |
| 50  | 7 | 0 | -13.161647 | 0.175012  | 0.006521  |
| 51  | 6 | 0 | -13.639500 | 1.264282  | 0.791575  |
| 52  | 6 | 0 | -14.549072 | 2.183782  | 0.247523  |
| 53  | 6 | 0 | -13.215167 | 1.425388  | 2.119636  |
| 54  | 6 | 0 | -15.026266 | 3.239237  | 1.022104  |
| 55  | 1 | 0 | -14.877012 | 2.064358  | -0.779644 |
| 56  | 6 | 0 | -13.684050 | 2.494398  | 2.880490  |
| 57  | 1 | 0 | -12.519698 | 0.711041  | 2.547504  |
| 58  | 6 | 0 | -14.594167 | 3.404652  | 2.339408  |
| 59  | 1 | 0 | -15.729705 | 3.943325  | 0.587134  |
| 60  | 1 | 0 | -13.346123 | 2.606162  | 3.906652  |
| 61  | 1 | 0 | -14.962832 | 4.232272  | 2.937384  |
| 62  | 6 | 0 | -14.084587 | -0.570976 | -0.781895 |
| 63  | 6 | 0 | -13.772127 | -0.921873 | -2.104594 |
| 64  | 6 | 0 | -15.324107 | -0.954364 | -0.247351 |
| 65  | 6 | 0 | -14.679679 | -1.652193 | -2.869092 |
| 66  | 1 | 0 | -12.819242 | -0.619515 | -2.525958 |
| 67  | 6 | 0 | -16.232319 | -1.669079 | -1.025768 |
| 68  | 1 | 0 | -15.568218 | -0.687227 | 0.775328  |
| 69  | 6 | 0 | -15.915358 | -2.026681 | -2.337674 |
| 70  | 1 | 0 | -14.423509 | -1.915915 | -3.891142 |
| 71  | 1 | 0 | -17.187882 | -1.958434 | -0.598044 |
| 72  | 1 | 0 | -16.622963 | -2.589092 | -2.938866 |
| 73  | 6 | 0 | 6.472372   | 1.460442  | -0.035942 |
| 74  | 6 | 0 | 7.656075   | 1.165712  | -0.032033 |
| 75  | 6 | 0 | 5.107556   | 1.778450  | -0.043116 |
| 76  | 6 | 0 | 9.033888   | 0.831230  | -0.024544 |
| 77  | 6 | 0 | 10.024719  | 1.827125  | 0.106704  |
| 78  | 6 | 0 | 9.456326   | -0.509513 | -0.146992 |
| 79  | 6 | 0 | 11.371481  | 1.498814  | 0.122770  |
| 80  | 1 | 0 | 9.722268   | 2.863813  | 0.212959  |
| 81  | 6 | 0 | 10.803257  | -0.837879 | -0.144827 |
| 82  | 1 | 0 | 8.711770   | -1.290734 | -0.259419 |
| 83  | 6 | 0 | 11.788122  | 0.159482  | -0.006107 |
| 84  | 1 | 0 | 12.113889  | 2.280014  | 0.240142  |
| 85  | 1 | 0 | 11.103537  | -1.873667 | -0.255375 |
| 86  | 7 | 0 | 13.159349  | -0.173538 | 0.002728  |
| 87  | 6 | 0 | 14.122466  | 0.714678  | -0.558848 |
| 88  | 6 | 0 | 15.311471  | 0.995187  | 0.131213  |
| 89  | 6 | 0 | 13.900923  | 1.309861  | -1.810296 |
| 90  | 6 | 0 | 16.260112  | 1.850737  | -0.425430 |
| 91  | 1 | 0 | 15.485088  | 0.539219  | 1.100265  |
| 92  | 6 | 0 | 14.847346  | 2.178263  | -2.350693 |
| 93  | 1 | 0 | 12.987539  | 1.088047  | -2.352189 |
| 94  | 6 | 0 | 16.032933  | 2.451062  | -1.665326 |
| 95  | 1 | 0 | 17.175710  | 2.058217  | 0.120810  |
| 96  | 1 | 0 | 14.661705  | 2.631395  | -3.320211 |
| 97  | 1 | 0 | 16.771166  | 3.122338  | -2.092938 |
| 98  | 6 | 0 | 13.603411  | -1.403043 | 0.570716  |
| 99  | 6 | 0 | 14.551376  | -2.189287 | -0.101391 |
| 100 | 6 | 0 | 13.110008  | -1.836776 | 1.810968  |
| 101 | 6 | 0 | 14.998353  | -3.382922 | 0.461659  |
| 102 | 1 | 0 | 14.932701  | -1.858639 | -1.061681 |
| 103 | 6 | 0 | 13.549504  | -3.040892 | 2.357354  |

|     |   |   |           |           |           |
|-----|---|---|-----------|-----------|-----------|
| 104 | 1 | 0 | 12.384222 | -1.227431 | 2.339151  |
| 105 | 6 | 0 | 14.497746 | -3.818817 | 1.689963  |
| 106 | 1 | 0 | 15.732318 | -3.980863 | -0.070776 |
| 107 | 1 | 0 | 13.158068 | -3.363815 | 3.317670  |
| 108 | 1 | 0 | 14.842732 | -4.752832 | 2.122438  |

-----  
Total Energy (HF)=-3401.271158Hartree
